# Supplementary material
Source: HighWire-hosted journal article supplement (https://erj.ersjournals.com/content/60/6/2200656)
Supplement: inline-supplementary-material-1 [file inline-supplementary-material-1.pdf]

## Supplementary material

**TABLE S1: Lung histopathological analysis in patients with *SOX17* variants (n=8)**

| <b><i>Patient</i></b>                            | <b><i>I-1</i></b> | <b><i>I-2</i></b> | <b><i>II</i></b> | <b><i>VIII</i></b> | <b><i>X</i></b> | <b><i>XII-1</i></b> | <b><i>XIII</i></b> | <b><i>XVII</i></b> | <b><i>%</i></b> |
|--------------------------------------------------|-------------------|-------------------|------------------|--------------------|-----------------|---------------------|--------------------|--------------------|-----------------|
| <b>Severe pulmonary arterial remodelling</b>     | Yes               | Yes               | Yes              | Yes                | Yes             | Yes                 | Yes                | Yes                | 8/8 (100%)      |
| <b>Congestive and/or haemorrhagic parenchyma</b> | Yes               | Yes               | Yes              | Yes                | Yes             | Yes                 | Yes                | Yes                | 8/8 (100%)      |
| <b>Pleural and subpleural vessel dilation</b>    | Yes               | Yes               | Yes              | Yes                | Yes             | Yes                 | Yes                | Yes                | 8/8 (100%)      |
| <b>Dilated bronchial arteries*</b>               | Yes               | Yes               | Yes              | No                 | Yes             | No                  | No                 | Yes                | 5/8 (63%)       |

*Main histological features included severe pulmonary artery remodelling, congestion or parenchymal haemorrhage, dilation of subpleural vessels and dilation of bronchial arteries. Pulmonary arteries were severely abnormal with major vascular wall thickening and plexiform lesions. Lung architecture was overall preserved, although congestion, parenchymal collapse (secondary to haemorrhagic infarction) as well as peripheral vessel dilation were constantly noticed in examining haematoxylin & eosin slides. Bronchial vessels also appeared altered, with dilation being observed in 5 out of 8 lung explants.*

*\*Dilation of bronchial vessels could only be observed in central lung samples.*
